# Supplementary material for: Predicting Impacts of Climate Change on Suitable Distribution of Critically Endangered Tree Species Yulania zenii in China
Source: Preprints.org preprint supplement (doi:10.20944/preprints202405.0266.v1), 2024-05-06
Supplement: Supplementary file 2 [file supplementary]

**Table S1**. Latitude and longitude coordinates of12 occurrence records of the endangered *Yulania zenii* in China.

| **No.** | **Species** | **Longitude(°)** | **Latitude(°)** |
| --- | --- | --- | --- |
| 1 | *Yulania zenii* | 115.6810 | 29.6765 |
| 2 | *Yulania zenii* | 115.4013 | 29.6661 |
| 3 | *Yulania zenii* | 115.4457 | 29.7027 |
| 4 | *Yulania zenii* | 115.4224 | 29.6737 |
| 5 | *Yulania zenii* | 119.0621 | 32.1552 |
| 6 | *Yulania zenii* | 119.0867 | 32.1337 |
| 7 | *Yulania zenii* | 119.0878 | 32.1469 |
| 8 | *Yulania zenii* | 119.2100 | 32.0833 |
| 9 | *Yulania zenii* | 119.0801 | 32.1233 |
| 10 | *Yulania zenii* | 119.2245 | 32.1256 |
| 11 | *Yulania zenii* | 113.9077 | 28.6189 |
| 12 | *Yulania zenii* | 113.1325 | 28.6909 |
